# Supplementary material for: Computational Design of Novel Cyclic Peptides Endowed with Autophagy-Inhibiting Activity on Cancer Cell Lines
Source: MDPI journal article supplement (doi:10.3390/ijms25094622), 2024-04-24
Supplement: s1 [file s1]

## Supplementary Materials

# Computational Design of Novel Cyclic Peptides Endowed with Autophagy Inhibiting Activity on Cancer Cell Lines

Marco Albani<sup>1</sup>, Enrico Mario Alessandro Fassi<sup>1,\*</sup>, Roberta Manuela Moretti<sup>2</sup>, Mariangela Garofalo<sup>3</sup>, Marina Montagnani Marelli<sup>2</sup>, Gabriella Roda<sup>1</sup>, Jacopo Sgrignani<sup>4</sup>, Andrea Cavalli<sup>4,5</sup>, and Giovanni Grazioso<sup>1,\*</sup>

<sup>1</sup> Department of Pharmaceutical Sciences, Università degli Studi di Milano, Via L. Mangiagalli 25, 20133 Milano, Italy;

<sup>2</sup> Department of Pharmacological and Biomolecular Sciences, Università degli Studi di Milano, Via Balzaretti 9, 20133 Milano, Italy;

<sup>3</sup> Department of Pharmaceutical and Pharmacological Sciences, Università di Padova, Via F. Marzolo 5, 35131 Padova, Italy;

<sup>4</sup> Institute for Research in Biomedicine (IRB), Via Chiesa 5, 6500 Bellinzona, Switzerland;

<sup>5</sup> Swiss Institute of Bioinformatics (SIB), University of Lausanne, Quartier UNIL-Sorge, Bâtiment Amphipôle, 1015 Lausanne, Switzerland.

\* Correspondence: enrico.fassi@unimi.it, giovanni.grazioso@unimi.it

**Table S1.** Computational alanine scanning data on LIR2-RavZ peptide.

| Mutation on LIR2-RavZ | $\Delta$ Affinity [kcal/mol] |
|-----------------------|------------------------------|
| DIDEFDLLEGDE          | 0.0                          |
| 1 (ASP→ALA)           | -0.8                         |
| 2 (ILE→ALA)           | +1.4                         |
| 3 (ASP→ALA)           | +13.1                        |
| 4 (GLU→ALA)           | +17.2                        |
| 5 (PHE→ALA)           | +19.7                        |
| 6 (ASP→ALA)           | +6.6                         |
| 7 (LEU→ALA)           | +5.0                         |
| 8 (LEU→ALA)           | +3.8                         |
| 9 (GLU→ALA)           | +4.3                         |
| 11 (ASP→ALA)          | +7.3                         |
| 12 (GLU→ALA)          | +1.2                         |

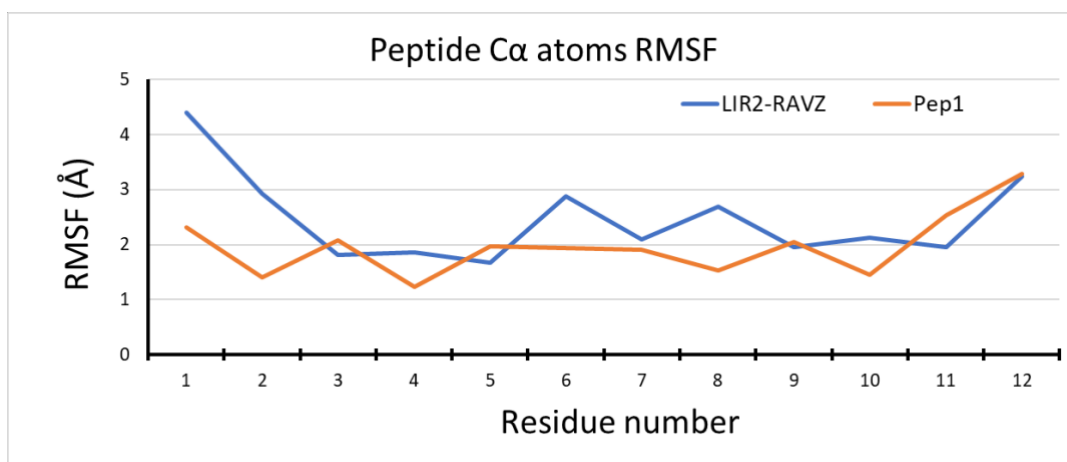

**Figure S1.** Cα atoms RMSF over the MD simulation time (250 ns).

**Table S2.** Computational alanine scanning data on Pep2. Residues in positions 10 and 12 were not mutated since they are needed to constrain the peptide.

| Mutation on Pep2                         | $\Delta$ Affinity [kcal/mol] |
|------------------------------------------|------------------------------|
| Ac-DIDEFDLLE <u>CDC</u> -NH <sub>2</sub> | 0.0                          |
| 1 (ASP->ALA)                             | +1.3                         |
| 2 (ILE->ALA)                             | +5.8                         |
| 3 (ASP->ALA)                             | +5.8                         |
| 4 (GLU->ALA)                             | +11.2                        |
| 5 (PHE->ALA)                             | +19.9                        |
| 6 (ASP->ALA)                             | +1.9                         |
| 7 (LEU->ALA)                             | +16.5                        |
| 8 (LEU->ALA)                             | +7.3                         |
| 9 (GLU->ALA)                             | +9.2                         |
| 11 (ASP->ALA)                            | +7.5                         |

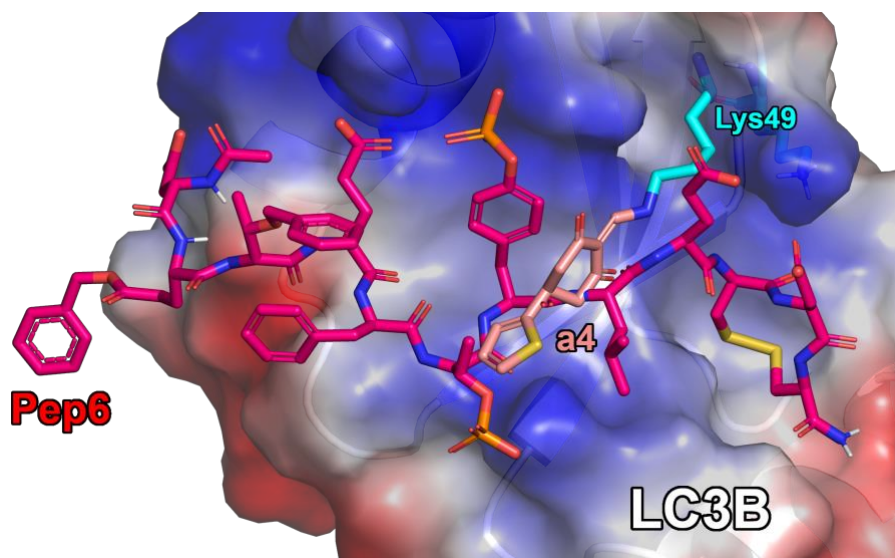

**Figure S2.** Superimposition of LC3B/Pep6 complex and LC3B/a4 X-ray structure (PDB code 7ELG). The protein surface is colored depending on the atomic partial charges of the protein residues: blue for positive and red for negative charges, respectively. Pep6 and the covalent ligand a4 are shown as magenta and pink sticks, respectively, while both the LC3B-Lys49 of LC3B/Pep6 complex and LC3B/a4 X-ray structure are represented as cyan sticks.

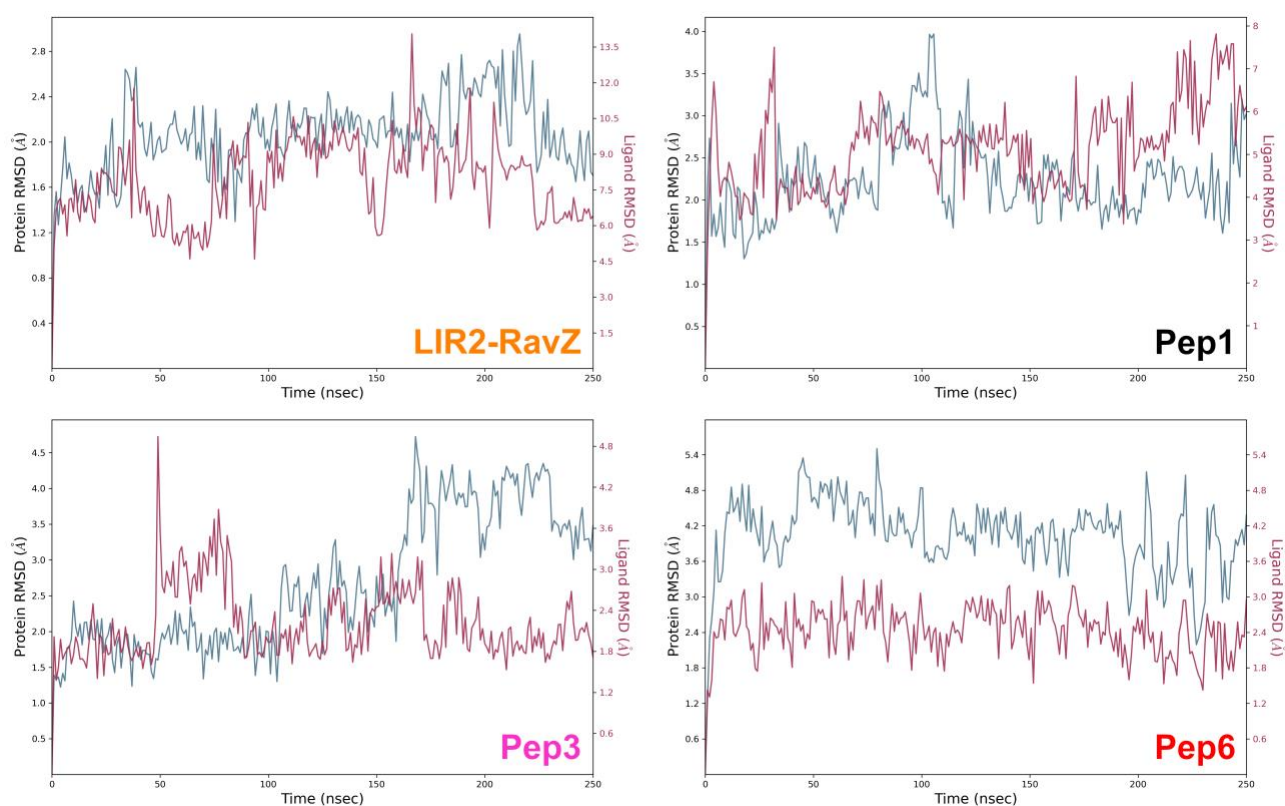

**Figure S3.** C $\alpha$  atoms RMSD plots of the main simulated systems over 250 ns of MD simulation time.

**Table S3.** Dataset overview of the Microscale Thermophoresis (MST) experiments accomplished using a fixed concentration of human recombinant His-tagged LC3B protein (10 nM) and different concentrations of LIR2-RavZ peptide, used as positive control, and Pep8. Two independent experiments were accomplished to compute the  $K_d$  value.

| Peptide   | MST Power | Exc. Power | Temp. | [Ligand] Range          | Time | RA  | SNR | $K_d$ (nM)    |
|-----------|-----------|------------|-------|-------------------------|------|-----|-----|---------------|
| LIR2-RavZ | 40%       | 20%        | 25 °C | 15.6 $\mu$ M – 0.477 nM | 5 s  | 4.4 | 9.1 | 428 $\pm$ 162 |
| Pep6      | 40%       | 20%        | 25 °C | 31.3 $\mu$ M – 0.954 nM | 10 s | 5.1 | 9.2 | 159 $\pm$ 56  |

RA = Response Amplitude; SNR = Signal-to-Noise Ratio.

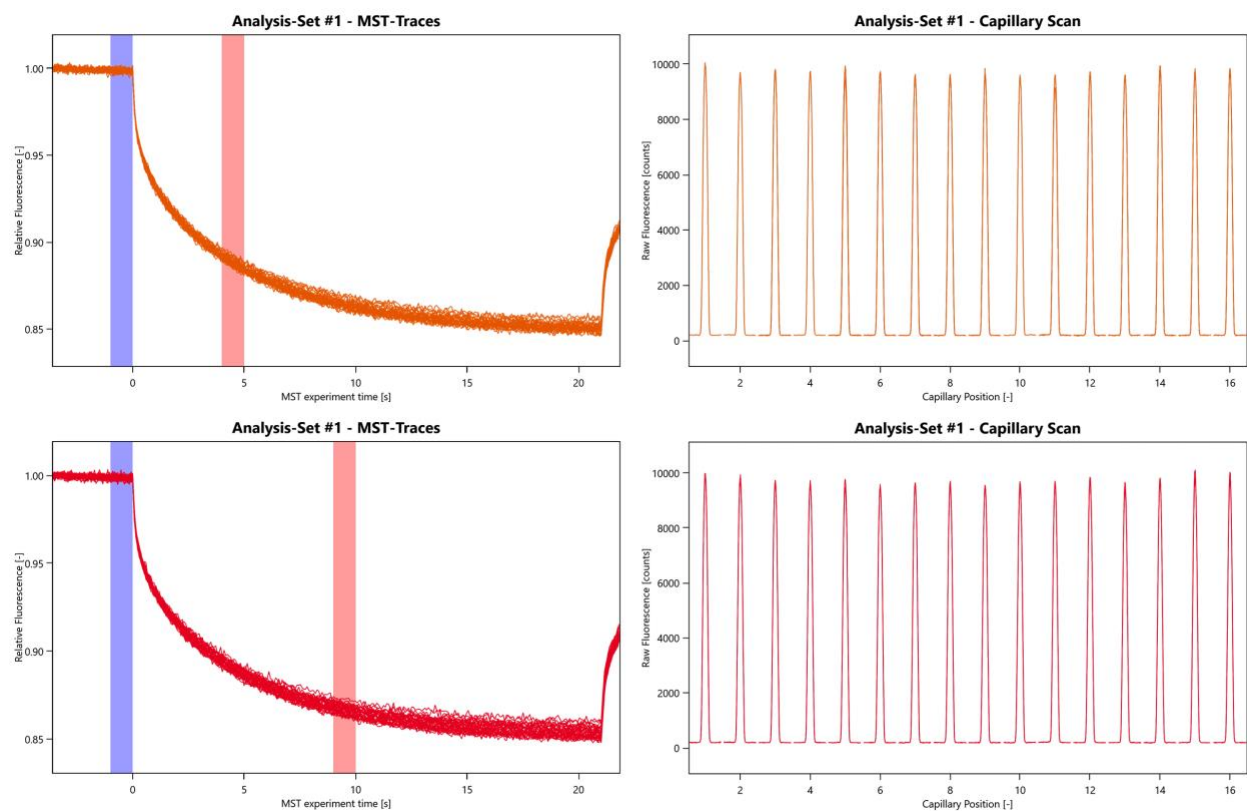

**Figure S4.** MST traces and raw fluorescence values, of each capillary scanned, acquired in the MST experiments accomplished to evaluate the binding of peptide LIR2-RavZ (top, orange) and Pep6 (bottom, red) to human recombinant LC3B protein.

# HPLC Analysis

Name :LIR2-RAVZ  
Sequence :DIDEFDLLEGDE(desalted)  
Lot.No :PCM15546-1-0919  
Pump A :0.1%Trifluoroacetic in 100% water  
Pump B :0.1%Trifluoroacetic in 100% acetonitrile  
Total Flow :1ml/min  
Wavelength :220nm  
Analytical column type :SHIMADZU Inertsil ODS-SP(4.6\*250mm\*5um)  
Dissolution method :100%H2O  
Inj. Volume :14 uL

| Time  | Module     | Action | Value |
|-------|------------|--------|-------|
| 0.01  | Pumps      | B.Conc | 10    |
| 20.00 | Pumps      | B.Conc | 50    |
| 23.00 | Pumps      | B.Conc | 100   |
| 38.00 | Pumps      | B.Conc | 100   |
| 40.00 | Pumps      | B.Conc | 10    |
| 50.00 | Controller | Stop   |       |

## Chromatogram

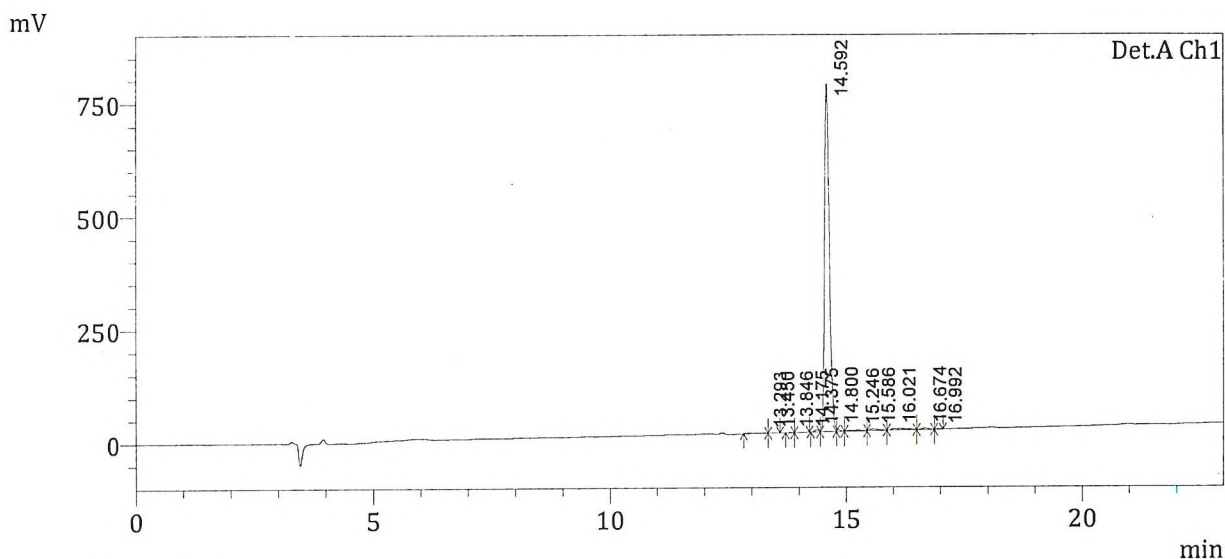

1 Det.A Ch1/220nm

## PeakTable

Detector A Ch1 220nm

| Peak# | Ret. Time | Area    | Height | Area %  | Height % |
|-------|-----------|---------|--------|---------|----------|
| 1     | 13.293    | 10034   | 503    | 0.177   | 0.063    |
| 2     | 13.450    | 3978    | 373    | 0.070   | 0.047    |
| 3     | 13.846    | 2454    | 361    | 0.043   | 0.045    |
| 4     | 14.175    | 2442    | 140    | 0.043   | 0.018    |
| 5     | 14.375    | 30812   | 4991   | 0.545   | 0.627    |
| 6     | 14.592    | 5382062 | 769760 | 95.173  | 96.637   |
| 7     | 14.800    | 29482   | 6576   | 0.521   | 0.825    |
| 8     | 15.246    | 37612   | 2418   | 0.665   | 0.304    |
| 9     | 15.586    | 44500   | 3352   | 0.787   | 0.421    |
| 10    | 16.021    | 78804   | 3973   | 1.394   | 0.499    |
| 11    | 16.674    | 31222   | 3782   | 0.552   | 0.475    |
| 12    | 16.992    | 1654    | 322    | 0.029   | 0.040    |
| Total |           | 5655055 | 796550 | 100.000 | 100.000  |

Pepmic Co., Ltd

Tel: +86-512-65834896 Email: info@pepmic.com Web: www.pepmic.com

Address: 12 Datong Road, High-tech Development Zone, Suzhou, China 215151



MS Spectrum Graph

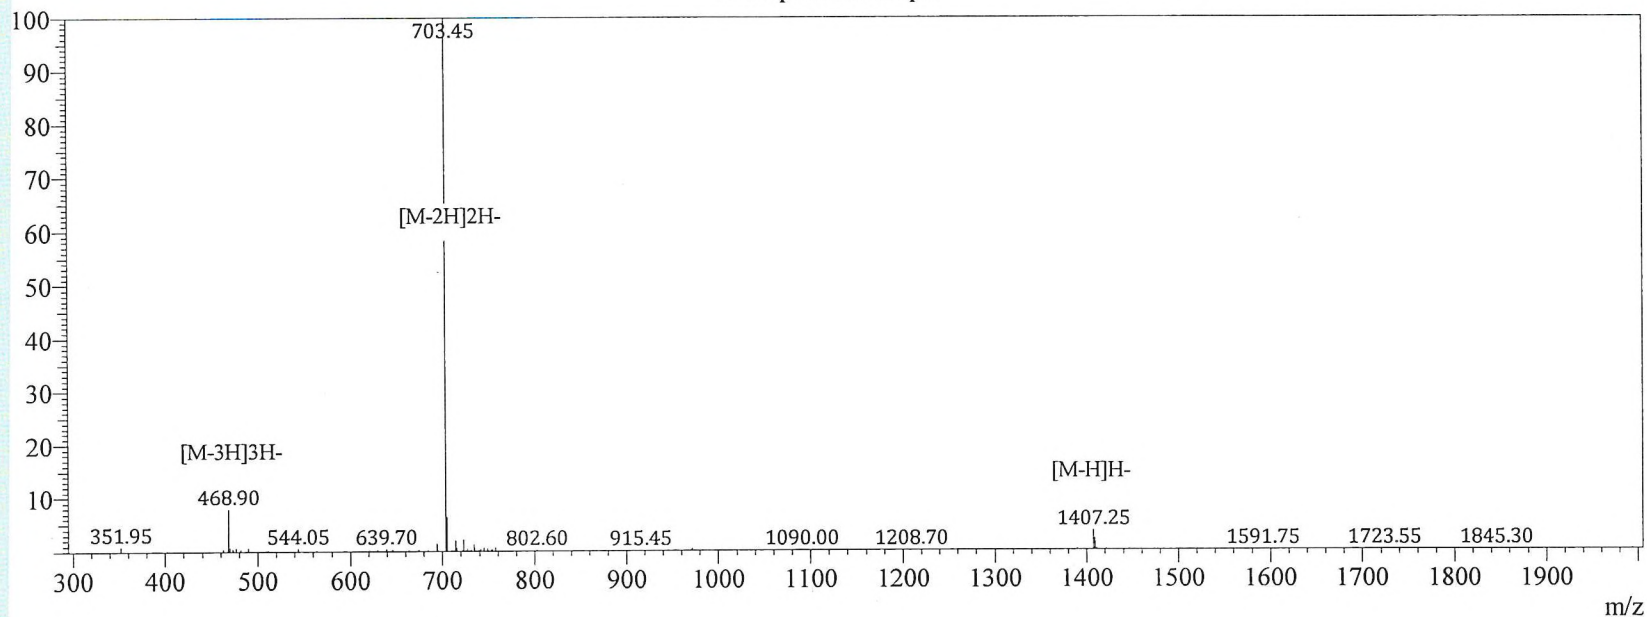

Sample Information

Dissolution method :5%NH<sub>3</sub>.H<sub>2</sub>O+8%ACN+87%H<sub>2</sub>O  
Modified Date :2022/10/11  
Injection Volume :1ul  
Heat Block Temp :200

Interface :ESI  
Nebulizing Gas Flow :1.50L/min  
CDL Temp :250C  
CDL Volt :0v

Prerod Bias :+1.5kv  
Detector :-0.2kv  
T.Flow :0.2ml/min  
B.conc :50%H<sub>2</sub>O/50%MEOH

Name :LIR2-RAVZ  
Sequence :DIDEFDLLEGDE(desalted)  
Lot.No :PCM15546-1-0919  
Theoretical :1409.39  
Observed :1408.90

Pepmic Co., Ltd

Tel: +86-512-65834896

Email: info@pepmic.com

Web: www.pepmic.com

Address: 12 Datong Road, High-tech Development Zone, Suzhou, China 215151

## HPLC Analysis

Name : Pep3  
 Sequence : Ac-D{E(Bz)}{T(Bz)}EF(pT)(pY)LEC\*DC\*-NH<sub>2</sub>(desalt)  
 Lot.No : PCM15768-0719  
 Pump A : 0.1% Trifluoroacetic in 100% water  
 Pump B : 0.1% Trifluoroacetic in 100% acetonitrile  
 Total Flow : 1ml/min  
 Wavelength : 220nm  
 Analytical column type : SHIMADZU Inertsil ODS-SP(4.6\*250mm\*5um)  
 Dissolution method : 15% ACN+85% H<sub>2</sub>O  
 Inj. Volume : 13 uL

| Time  | Module     | Action | Value |
|-------|------------|--------|-------|
| 0.01  | Pumps      | B.Conc | 30    |
| 20.00 | Pumps      | B.Conc | 70    |
| 23.00 | Pumps      | B.Conc | 100   |
| 38.00 | Pumps      | B.Conc | 100   |
| 40.00 | Pumps      | B.Conc | 30    |
| 50.00 | Controller | Stop   |       |

## Chromatogram

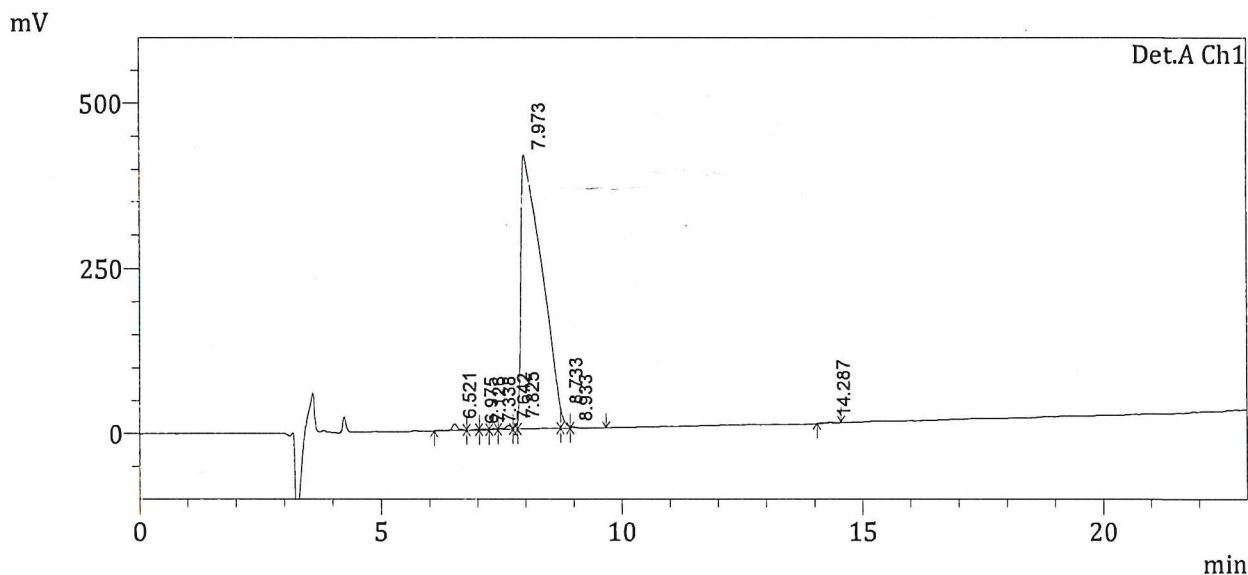

1 Det.A Ch1/220nm

PeakTable

Detector A Ch1 220nm

| Peak# | Ret. Time | Area     | Height | Area %  | Height % |
|-------|-----------|----------|--------|---------|----------|
| 1     | 6.521     | 89432    | 10327  | 0.695   | 2.155    |
| 2     | 6.975     | 15351    | 1773   | 0.119   | 0.370    |
| 3     | 7.126     | 23245    | 2385   | 0.181   | 0.497    |
| 4     | 7.338     | 21389    | 2453   | 0.166   | 0.512    |
| 5     | 7.642     | 60719    | 6411   | 0.472   | 1.338    |
| 6     | 7.825     | 30795    | 8618   | 0.239   | 1.798    |
| 7     | 7.973     | 12471083 | 414702 | 96.851  | 86.519   |
| 8     | 8.733     | 131096   | 28868  | 1.018   | 6.023    |
| 9     | 8.933     | 20294    | 2842   | 0.158   | 0.593    |
| 10    | 14.287    | 13185    | 941    | 0.102   | 0.196    |
| Total |           | 12876589 | 479319 | 100.000 | 100.000  |

Pepmic Co., Ltd

Tel: +86-512-65834896 Email: info@pepmic.com Web: www.pepmic.com

Address: 12 Datong Road, High-tech Development Zone, Suzhou, China 215151

MS Spectrum Graph

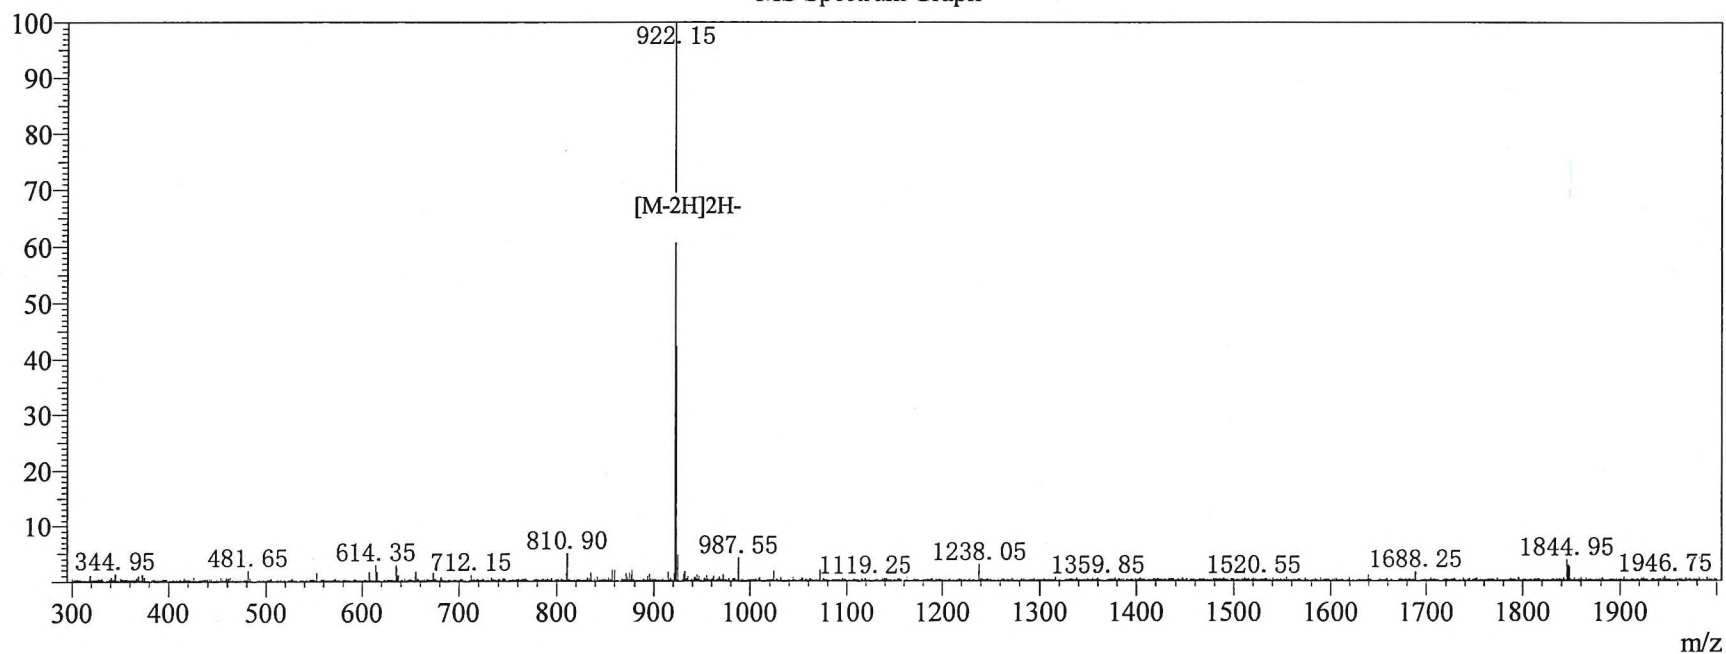

Sample Information

|                    |                                                  |                     |            |             |                 |
|--------------------|--------------------------------------------------|---------------------|------------|-------------|-----------------|
| Dissolution method | :5%NH3.H2O+8%ACN+87%H2O                          | Interface           | :ESI       | Prerod Bias | :+1.5kv         |
| Modified Date      | :2023/09/22                                      | Nebulizing Gas Flow | :1.50L/min | Detector    | :-0.2kv         |
| Injection Volume   | :1ul                                             | CDL Temp            | :250C      | T.Flow      | :0.2ml/min      |
| Heat Block Temp    | :200                                             | CDL Volt            | :0v        | B.conc      | :50%H2O/50%MEOH |
| Name               | :Pep3                                            |                     |            |             |                 |
| Sequence           | :Ac-D{E(Bz)}{T(Bz)}EF(pT)(pY)LEC*DC*-NH2(desalt) |                     |            |             |                 |
| Lot.No             | :PCM15768-0719                                   |                     |            |             |                 |
| Theoretical        | :1846.70                                         |                     |            |             |                 |
| Observed           | :1846.30                                         |                     |            |             |                 |

Pepmic Co., Ltd

Tel: +86-512-65834896

Email: info@pepmic.com

Web: www.pepmic.com

Address: 12 Datong Road, High-tech Development Zone, Suzhou, China 215151



# HPLC Analysis

Name :Pep6  
Sequence :Ac-D{E(Bn)}{t(Bn)}Ef(pt)(pY)LEc\*Dc\*-NH2(desalted)  
Lot.No :PCM15546-3-0919  
Pump A :0.1%Trifluoroacetic in 100% water  
Pump B :0.1%Trifluoroacetic in 100% acetonitrile  
Total Flow :1ml/min  
Wavelength :220nm  
Analytical column type :SHIMADZU Inertsil ODS-SP(4.6\*250mm\*5um)  
Dissolution method :15%ACN+85%H2O  
Inj. Volume :12 uL

| Time  | Module     | Action | Value |
|-------|------------|--------|-------|
| 0.01  | Pumps      | B.Conc | 25    |
| 20.00 | Pumps      | B.Conc | 65    |
| 23.00 | Pumps      | B.Conc | 100   |
| 38.00 | Pumps      | B.Conc | 100   |
| 40.00 | Pumps      | B.Conc | 25    |
| 50.00 | Controller | Stop   |       |

## Chromatogram

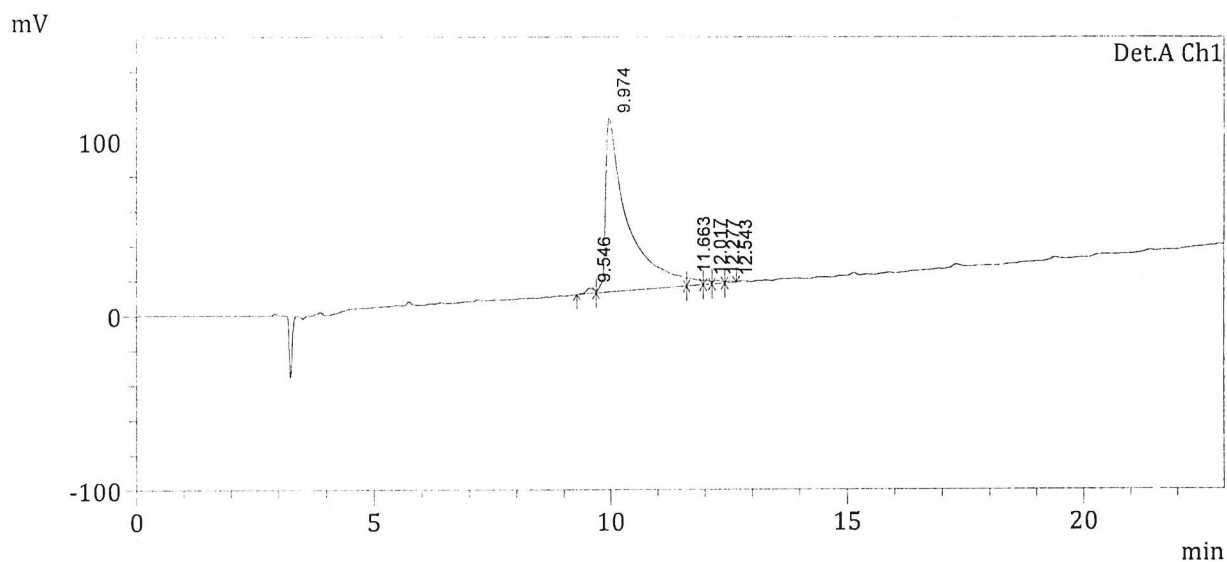

PeakTable

Detector A Ch1 220nm

| Peak# | Ret. Time | Area    | Height | Area %  | Height % |
|-------|-----------|---------|--------|---------|----------|
| 1     | 9.546     | 35947   | 3277   | 1.052   | 2.903    |
| 2     | 9.974     | 3253816 | 99647  | 95.194  | 88.284   |
| 3     | 11.663    | 72093   | 4546   | 2.109   | 4.027    |
| 4     | 12.017    | 24073   | 2544   | 0.704   | 2.254    |
| 5     | 12.277    | 22670   | 1874   | 0.663   | 1.661    |
| 6     | 12.543    | 9490    | 983    | 0.278   | 0.871    |
| Total |           | 3418089 | 112870 | 100.000 | 100.000  |

Pepmic Co., Ltd

Tel: +86-512-65834896 Email: info@pepmic.com Web: www.pepmic.com

Address: 12 Datong Road, High-tech Development Zone, Suzhou, China 215151

MS Spectrum Graph

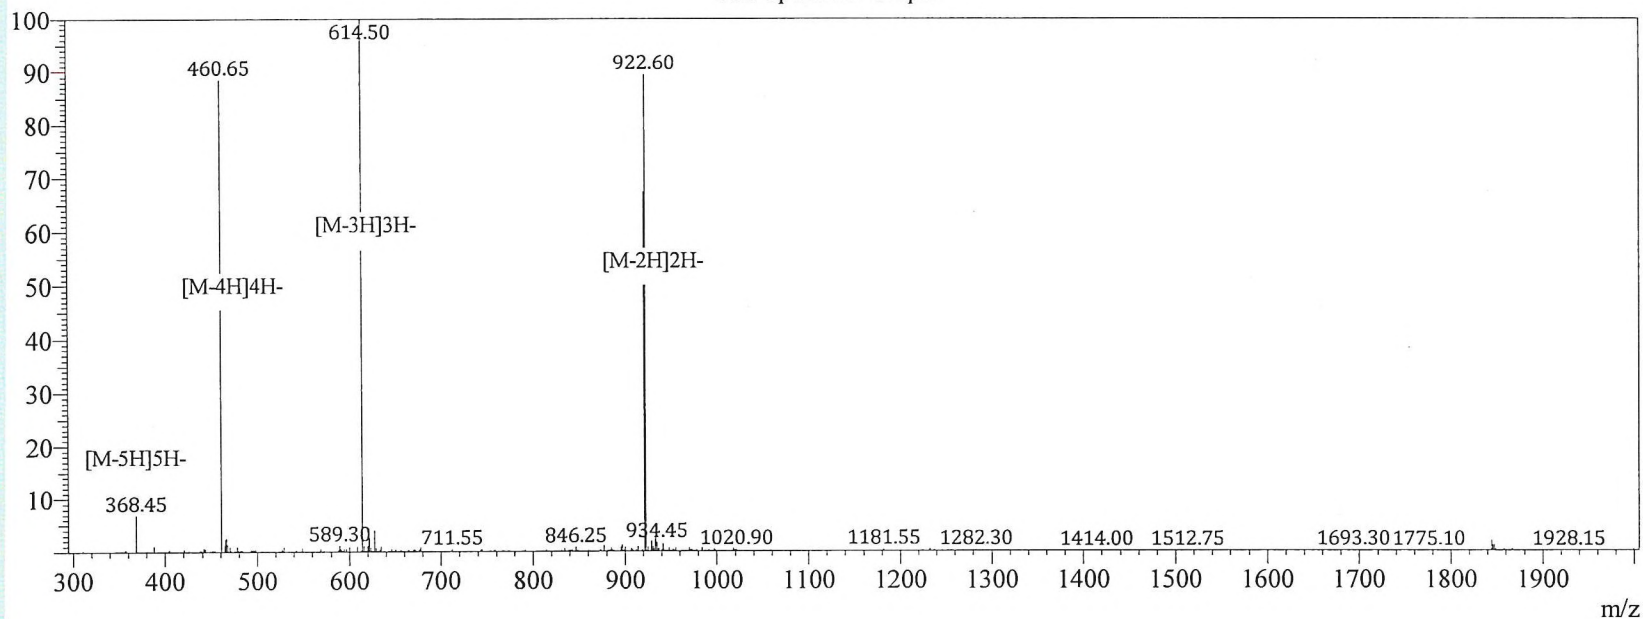

Sample Information

|                    |                                                                 |                     |            |             |                              |
|--------------------|-----------------------------------------------------------------|---------------------|------------|-------------|------------------------------|
| Dissolution method | :5%NH <sub>3</sub> .H <sub>2</sub> O+8%ACN+87%H <sub>2</sub> O  | Interface           | :ESI       | Prerod Bias | :+1.5kv                      |
| Modified Date      | :2022/10/10                                                     | Nebulizing Gas Flow | :1.50L/min | Detector    | :-0.2kv                      |
| Injection Volume   | :1ul                                                            | CDL Temp            | :250C      | T.Flow      | :0.2ml/min                   |
| Heat Block Temp    | :200                                                            | CDL Volt            | :0v        | B.conc      | :50%H <sub>2</sub> O/50%MEOH |
| Name               | :Pep6                                                           |                     |            |             |                              |
| Sequence           | :Ac-D{E(Bn)}{t(Bn)}Ef(pt)(pY)LEc*Dc*-NH <sub>2</sub> (desalted) |                     |            |             |                              |
| Lot.No             | :PCM15546-3-0919                                                |                     |            |             |                              |
| Theoretical        | :1846.65                                                        |                     |            |             |                              |
| Observed           | :1846.50                                                        |                     |            |             |                              |

Pepmic Co., Ltd

Tel: +86-512-65834896

Email: info@peppmic.com

Web: www.peppmic.com

Address: 12 Datong Road, High-tech Development Zone, Suzhou, China 215151
